# Supplementary material
Source: PubMed Central journal article supplement (PMC9619770)
Supplement: deac215_supplementary_table_si.pdf [file deac215_supplementary_table_si.pdf]

**Supplementary Table S1** European countries included, availability and source of data.

| Country           | Data on monthly births | Data up to 2021 | Data available | National statistics office                                                                 |
|-------------------|------------------------|-----------------|----------------|--------------------------------------------------------------------------------------------|
| Albania           | NA                     | A               | NA             | Instat                                                                                     |
| Austria           | A                      | A               | A              | Statistics Austria                                                                         |
| Belarus           | NA                     | NA              | NA             | National Statistical Committee of the Republic of Belarus                                  |
| Belgium           | A                      | A               | A              | StatBel                                                                                    |
| Bosnia Bulgaria   | NA A                   | NA NA           | NA A           | Agency for Statistics of Bosnia and Herzegovina National Statistical Institute of Bulgaria |
| Cyprus            | NA                     | NA              | NA             | Statistical service of Cyprus                                                              |
| Croatia           | A                      | A               | A              | Croatian Bureau of Statistics                                                              |
| Czech Republic    | A                      | A               | A              | Czech statistical office                                                                   |
| Denmark           | A                      | A               | A              | Statistics Denmark                                                                         |
| Estonia           | A                      | A               | A              | Statistics Estonia                                                                         |
| Finland           | A                      | A               | A              | Statistics Finland                                                                         |
| France            | A                      | A               | A              | National Institute of Statistics and Economics                                             |
| Germany           | A                      | A               | A              | Federal Statistical Office of Germany                                                      |
| Greece            | NA                     | NA              | NA             | Hellenic Statistical Authority                                                             |
| Hungary           | A                      | A               | A              | Hungarian Central Statistical Office                                                       |
| Ireland           | NA                     | NA              | NA             | Central statistics office                                                                  |
| Iceland           | A                      | NA              | A              | Statistics Iceland                                                                         |
| Italy             | A                      | A               | A              | Istituto Nazionale di Statistica                                                           |
| Kosovo            | A                      | NA              | NA             | Kosovo Agency of Statistics                                                                |
| Latvia            | A                      | A               | A              | Central Statistical Bureau of Latvia                                                       |
| Liechtenstein     | NA                     | NA              | NA             | Office of Statistics                                                                       |
| Lithuania         | A                      | A               | A              | Official Statistics Portal                                                                 |
| Luxembourg        | A                      | NA              | NA             | Statistics portal of Luxembourg                                                            |
| Macedonia         | NA                     | NA              | NA             | State Statistical Office of Macedonia                                                      |
| Malta             | NA                     | NA              | NA             | National statistics office of Malta                                                        |
| Moldavia          | NA                     | NA              | NA             | National Bureau of Statistics of Moldova                                                   |
| Monaco            | NA                     | NA              | NA             | IMSEE Monaco Statistics                                                                    |
| Montenegro        | NA                     | NA              | NA             | Statistical Office of Montenegro                                                           |
| Netherlands       | A                      | A               | A              | CBS National statistics                                                                    |
| Norway            | A                      | NA              | A              | Statistics Norway                                                                          |
| Poland            | NA                     | NA              | NA             | Statistics Poland                                                                          |
| Portugal Romania  | A A                    | A A             | A A            | Instituto Nacional de Estadística National Institute of Statistics Romania                 |
| Russia            | A                      | A               | A              | Federal State Statistics Service of Russia, Rosstat                                        |
| Serbia            | A                      | NA              | NA             | Statistical office of the Republic of Serbia                                               |
| Slovakia          | NA                     | NA              | NA             | Statistical Office of the Slovak republic                                                  |
| Slovenia          | A                      | A               | A              | Republic of Slovenia Statistical office                                                    |
| Spain             | A                      | A               | A              | Instituto Nacional de Estadística                                                          |
| Sweden            | A                      | A               | A              | Statistics sweden                                                                          |
| Switzerland       | A                      | A               | A              | Office Fédéral de la Santé Publique                                                        |
| Ukraine           | A                      | A               | A              | State Statistics Service of Ukraine                                                        |
| UK:               |                        |                 |                |                                                                                            |
| England and Wales | A                      | A               | A              | Office for National Statistics                                                             |
| UK:               |                        |                 |                |                                                                                            |
| Scotland          | A                      | A               | A              | Office for National Statistics                                                             |

A, available; NA, non-available.

Countries included.
