# Supplementary material
Source: PubMed Central journal article supplement (PMC9619770)
Supplement: deac215_supplementary_table_sii.pdf [file deac215_supplementary_table_sii.pdf]

**Supplementary Table SII Evolution of birthrates during the pre-pandemic period (2015–2019).**

| Year                                 | Austria       | Belgium       | Croatia       | Czechia      | Denmark       | Estonia       | Finland       | France        | Germany       | Hungary             | Italy         | Latvia        |               |
|--------------------------------------|---------------|---------------|---------------|--------------|---------------|---------------|---------------|---------------|---------------|---------------------|---------------|---------------|---------------|
| <b>2015</b>                          | 84 381        | 121 713       | 37 503        | 110 764      | 58 205        | 13 907        | 55 472        | 760 421       | 737 575       | 91 690              | 473 461       | 21 979        |               |
| <b>2016</b>                          | 87 675        | 121 161       | 37 537        | 112 663      | 61 614        | 14 053        | 52 814        | 744 697       | 792 131       | 93 063              | 465 596       | 21 968        |               |
| <b>2017</b>                          | 87 633        | 119 102       | 36 556        | 114 405      | 61 397        | 13 784        | 50 321        | 730 242       | 784 884       | 91 577              | 457 283       | 20 828        |               |
| <b>2018</b>                          | 85 535        | 117 800       | 36 945        | 114 036      | 61 476        | 14 367        | 47 577        | 719 737       | 787 523       | 89 807              | 439 375       | 19 314        |               |
| <b>2019</b>                          | 84 952        | 117 103       | 36 135        | 112 231      | 61 167        | 14 099        | 45 613        | 714 029       | 778 090       | 89 193              | 420 084       | 18 786        |               |
| <b>Average annual rate of change</b> | <b>0.20%</b>  | <b>−0.96%</b> | <b>−0.91%</b> | <b>0.34%</b> | <b>1.28%</b>  | <b>0.37%</b>  | <b>−4.77%</b> | <b>−1.56%</b> | <b>1.41%</b>  | <b>−0.68%</b>       | <b>−2.94%</b> | <b>−3.81%</b> |               |
| Year                                 | Lithuania     | Netherlands   | Portugal      | Romania      | Russia        | Slovenia      | Spain         | Sweden        | Switzerland   | UK: England & Wales | UK: Scotland  | Ukraine       | Total         |
| <b>2015</b>                          | 31 475        | 170 510       | 85 500        | 203 055      | 1 911 042     | 20 641        | 418 432       | 114 870       | 86 559        | 697 852             | 55 105        | 411 783       | 6 773 895     |
| <b>2016</b>                          | 30 623        | 172 520       | 87 126        | 203 231      | 1 860 434     | 20 345        | 408 734       | 117 425       | 87 883        | 696 271             | 54 580        | 397 039       | 6 741 183     |
| <b>2017</b>                          | 28 696        | 169 836       | 86 154        | 191 694      | 1 664 615     | 20 241        | 391 265       | 115 416       | 87 381        | 679 106             | 52 942        | 363 987       | 6 419 345     |
| <b>2018</b>                          | 28 149        | 168 525       | 87 020        | 190 170      | 1 579 559     | 19 585        | 370 827       | 115 832       | 87 851        | 657 076             | 51 307        | 335 874       | 6 225 267     |
| <b>2019</b>                          | 27 393        | 169 680       | 86 579        | 203 109      | 1 461 036     | 19 328        | 358 747       | 114 523       | 86 172        | 640 635             | 49 469        | 308 817       | 6 016 970     |
| <b>Average annual rate of change</b> | <b>−3.40%</b> | <b>−0.12%</b> | <b>0.32%</b>  | <b>0.10%</b> | <b>−6.45%</b> | <b>−1.62%</b> | <b>−3.77%</b> | <b>−0.06%</b> | <b>−0.10%</b> | <b>−2.11%</b>       | <b>−2.66%</b> | <b>−6.92%</b> | <b>−2.91%</b> |
