# Supplementary material
Source: PubMed Central journal article supplement (PMC9619770)
Supplement: deac215_supplementary_table_siii.pdf [file deac215_supplementary_table_siii.pdf]

**Supplementary Table SIII Live births per month in included countries.**

| Months                | Austria | Belgium | Croatia | Czechia | Denmark | Estonia | Finland | France | Germany | Hungary | Italy | Latvia |
|-----------------------|---------|---------|---------|---------|---------|---------|---------|--------|---------|---------|-------|--------|
| <b>January 2018</b>   | 7219    | 9766    | 3128    | 9471    | 5061    | 1140    | 4088    | 59752  | 65402   | 7789    | 38321 | 1609   |
| <b>February 2018</b>  | 6529    | 8618    | 2819    | 8497    | 4660    | 1061    | 3657    | 52733  | 58489   | 6845    | 32836 | 1492   |
| <b>March 2018</b>     | 6967    | 9626    | 2982    | 9484    | 5065    | 1227    | 3974    | 56391  | 63639   | 7140    | 34535 | 1637   |
| <b>April 2018</b>     | 6790    | 9434    | 2660    | 9321    | 5011    | 1217    | 3989    | 55364  | 62141   | 6717    | 31995 | 1646   |
| <b>May 2018</b>       | 7386    | 10203   | 2793    | 9685    | 5291    | 1288    | 4113    | 61232  | 67393   | 7077    | 35920 | 1684   |
| <b>June 2018</b>      | 7217    | 10007   | 3041    | 10073   | 5326    | 1314    | 4051    | 60292  | 68305   | 7535    | 35983 | 1750   |
| <b>July 2018</b>      | 7874    | 10594   | 3444    | 10464   | 5638    | 1372    | 4222    | 64823  | 73589   | 8286    | 39897 | 1807   |
| <b>August 2018</b>    | 7588    | 10555   | 3268    | 10319   | 5457    | 1286    | 4351    | 63860  | 71466   | 7984    | 39547 | 1697   |
| <b>September 2018</b> | 7430    | 9879    | 3371    | 9828    | 5243    | 1206    | 3944    | 61834  | 70165   | 7950    | 38473 | 1635   |
| <b>October 2018</b>   | 7182    | 10230   | 3268    | 9538    | 5213    | 1185    | 3915    | 63588  | 67115   | 7983    | 39095 | 1506   |
| <b>November 2018</b>  | 6647    | 9429    | 3099    | 8666    | 4755    | 1032    | 3719    | 59937  | 60129   | 7309    | 36310 | 1436   |
| <b>December 2018</b>  | 6706    | 9459    | 3072    | 8690    | 4756    | 1039    | 3554    | 59931  | 59690   | 7192    | 36463 | 1415   |
| <b>January 2019</b>   | 7061    | 9946    | 3119    | 9403    | 4929    | 1032    | 3867    | 59866  | 63275   | 7376    | 36647 | 1462   |
| <b>February 2019</b>  | 6363    | 8784    | 2722    | 8390    | 4505    | 1046    | 3288    | 51832  | 57184   | 6544    | 30628 | 1393   |
| <b>March 2019</b>     | 6859    | 9247    | 2853    | 9137    | 4795    | 1178    | 3778    | 56592  | 61679   | 6944    | 33079 | 1549   |
| <b>April 2019</b>     | 6889    | 9574    | 2775    | 9292    | 4898    | 1178    | 3750    | 55652  | 62634   | 6897    | 31650 | 1541   |
| <b>May 2019</b>       | 7038    | 9973    | 2816    | 9541    | 5177    | 1186    | 3735    | 60092  | 64942   | 7102    | 33899 | 1543   |
| <b>June 2019</b>      | 7118    | 9847    | 2778    | 9894    | 5245    | 1278    | 3817    | 59768  | 66716   | 7096    | 33751 | 1615   |
| <b>July 2019</b>      | 7804    | 10763   | 3285    | 10502   | 5674    | 1309    | 4128    | 64579  | 72660   | 8378    | 37387 | 1790   |
| <b>August 2019</b>    | 7489    | 10241   | 3078    | 10094   | 5715    | 1344    | 4122    | 62998  | 71562   | 7983    | 37132 | 1732   |
| <b>September 2019</b> | 7478    | 9936    | 3304    | 9637    | 5463    | 1219    | 4052    | 61515  | 70057   | 7972    | 38502 | 1609   |
| <b>October 2019</b>   | 7348    | 10130   | 3231    | 9307    | 5276    | 1142    | 3848    | 62636  | 66830   | 7805    | 38554 | 1560   |
| <b>November 2019</b>  | 6646    | 9334    | 3116    | 8672    | 4879    | 1106    | 3649    | 58700  | 60560   | 7315    | 34769 | 1454   |
| <b>December 2019</b>  | 6859    | 9328    | 3058    | 8362    | 4611    | 1081    | 3579    | 59799  | 59991   | 7781    | 34086 | 1538   |
| <b>January 2020</b>   | 6932    | 9668    | 3379    | 9330    | 4937    | 1119    | 3907    | 59000  | 63713   | 8105    | 35918 | 1508   |
| <b>February 2020</b>  | 6327    | 8684    | 2881    | 8586    | 4780    | 1040    | 3633    | 53700  | 58700   | 7060    | 31994 | 1344   |
| <b>March 2020</b>     | 6802    | 9687    | 2512    | 8830    | 4933    | 1032    | 3899    | 57700  | 62230   | 7092    | 31757 | 1471   |
| <b>April 2020</b>     | 6666    | 9493    | 2873    | 8968    | 4821    | 1056    | 3758    | 54700  | 61239   | 7067    | 30157 | 1551   |
| <b>May 2020</b>       | 7082    | 9581    | 2763    | 9374    | 5052    | 1183    | 3876    | 59000  | 64704   | 7282    | 32060 | 1567   |
| <b>June 2020</b>      | 7099    | 9752    | 2917    | 9449    | 5367    | 1118    | 3858    | 58500  | 66110   | 7743    | 33132 | 1516   |
| <b>July 2020</b>      | 7679    | 10413   | 3138    | 10234   | 5625    | 1286    | 4184    | 62400  | 71062   | 8662    | 36295 | 1545   |
| <b>August 2020</b>    | 7543    | 9769    | 3168    | 9872    | 5680    | 1170    | 4193    | 60200  | 69692   | 8142    | 36014 | 1550   |
| <b>September 2020</b> | 7330    | 9706    | 3290    | 9611    | 5196    | 1193    | 3955    | 59700  | 69457   | 8514    | 37596 | 1494   |
| <b>October 2020</b>   | 7195    | 9608    | 3286    | 9273    | 5200    | 1070    | 3926    | 60700  | 66019   | 8041    | 36669 | 1376   |
| <b>November 2020</b>  | 6413    | 8733    | 2942    | 8294    | 4719    | 968     | 3608    | 56100  | 59502   | 7425    | 31932 | 1324   |

(continued)

**Supplementary Table SIII Continued**

| Months                | Austria   | Belgium     | Croatia  | Czechia | Denmark | Estonia  | Finland | France | Germany     | Hungary               | Italy        | Latvia  |
|-----------------------|-----------|-------------|----------|---------|---------|----------|---------|--------|-------------|-----------------------|--------------|---------|
| <b>December 2020</b>  | 6535      | 8645        | 2807     | 8379    | 4627    | 974      | 3666    | 55 300 | 60 716      | 7205                  | 30 580       | 1306    |
| <b>January 2021</b>   | 6894      | 8652        | 3034     | 9137    | 5092    | 947      | 3997    | 51 200 | 59 799      | 7342                  | 31 065       | 1298    |
| <b>February 2021</b>  | 6613      | 8680        | 2844     | 8693    | 4770    | 993      | 3882    | 49 200 | 61 841      | 7161                  | 29 566       | 1247    |
| <b>March 2021</b>     | 7039      | 10 007      | 3155     | 9419    | 5286    | 1230     | 4315    | 57 900 | 65 903      | 7812                  | 33 284       | 1479    |
| <b>April 2021</b>     | 6716      | 9700        | 2894     |         | 4988    | 1057     | 4019    | 56 900 | 62 538      | 7014                  | 30 229       | 1343    |
| <b>May 2021</b>       | 7099      | 9564        | 2913     |         | 5323    | 1148     | 4077    | 57 700 | 64 848      | 7124                  | 30 606       | 1478    |
| <b>June 2021</b>      | 7147      | 9900        | 2899     |         | 5245    | 1044     | 4305    | 57 400 |             | 7714                  |              | 1506    |
| Months                | Lithuania | Netherlands | Portugal | Romania | Russia  | Slovenia | Spain   | Sweden | Switzerland | UK: England and Wales | UK: Scotland | Ukraine |
| <b>January 2018</b>   | 2401      | 14 111      | 7169     | 18 152  | 135 259 | 1628     | 31 614  | 9378   | 7254        | 56 173                | 4262         | 30 206  |
| <b>February 2018</b>  | 2102      | 12 269      | 6182     | 15 281  | 119 015 | 1464     | 28 086  | 8722   | 6512        | 48 792                | 3843         | 26 237  |
| <b>March 2018</b>     | 2371      | 13 415      | 6796     | 16 282  | 131 914 | 1611     | 30 206  | 10 077 | 7169        | 53 875                | 4108         | 28 164  |
| <b>April 2018</b>     | 2307      | 13 417      | 6720     | 15 073  | 126 459 | 1525     | 29 302  | 10 227 | 7014        | 52 639                | 4178         | 25 395  |
| <b>May 2018</b>       | 2498      | 14 619      | 7525     | 16 288  | 128 499 | 1680     | 30 906  | 10 498 | 7494        | 56 599                | 4403         | 27 811  |
| <b>June 2018</b>      | 2463      | 14 192      | 7057     | 16 660  | 135 114 | 1680     | 30 380  | 10 154 | 7521        | 54 968                | 4338         | 26 474  |
| <b>July 2018</b>      | 2563      | 15 297      | 7354     | 18 182  | 143 874 | 1811     | 32 342  | 10 431 | 8071        | 56 824                | 4578         | 31 461  |
| <b>August 2018</b>    | 2403      | 15 132      | 7864     | 16 513  | 145 813 | 1774     | 32 860  | 10 418 | 8054        | 56 719                | 4413         | 30 797  |
| <b>September 2018</b> | 2463      | 14 955      | 7849     | 16 827  | 134 426 | 1690     | 31 224  | 9624   | 7644        | 56 145                | 4322         | 28 549  |
| <b>October 2018</b>   | 2336      | 14 424      | 7868     | 15 378  | 135 297 | 1671     | 32 874  | 9401   | 7365        | 56 663                | 4379         | 30 970  |
| <b>November 2018</b>  | 2116      | 13 581      | 7339     | 12 937  | 123 770 | 1560     | 30 546  | 8549   | 6962        | 54 037                | 4228         | 26 539  |
| <b>December 2018</b>  | 2126      | 13 113      | 7297     | 12 597  | 120 119 | 1491     | 30 487  | 8353   | 6791        | 53 642                | 4255         | 23 271  |
| <b>January 2019</b>   | 2264      | 14 192      | 7266     | 17 981  | 124 025 | 1656     | 30 858  | 9620   | 7246        | 53 715                | 4186         | 27 801  |
| <b>February 2019</b>  | 2017      | 12 149      | 6404     | 15 361  | 111 223 | 1325     | 27 324  | 8821   | 6398        | 48 226                | 3731         | 23 695  |
| <b>March 2019</b>     | 2250      | 13 549      | 6941     | 16 162  | 117 098 | 1584     | 29 333  | 9811   | 7031        | 52 898                | 4147         | 24 629  |
| <b>April 2019</b>     | 2275      | 13 717      | 6782     | 16 107  | 118 821 | 1545     | 28 780  | 10 064 | 7124        | 51 161                | 4038         | 22 980  |
| <b>May 2019</b>       | 2387      | 14 349      | 7194     | 17 104  | 120 068 | 1676     | 29 732  | 10 278 | 7439        | 55 120                | 4246         | 27 618  |
| <b>June 2019</b>      | 2385      | 14 233      | 6768     | 16 868  | 117 431 | 1635     | 28 475  | 10 014 | 7332        | 53 584                | 4115         | 22 826  |
| <b>July 2019</b>      | 2721      | 15 476      | 7597     | 19 242  | 138 437 | 1788     | 31 329  | 10 478 | 7902        | 56 474                | 4493         | 29 765  |
| <b>August 2019</b>    | 2535      | 15 442      | 7624     | 18 016  | 131 728 | 1731     | 31 134  | 10 241 | 7485        | 55 392                | 4357         | 28 259  |
| <b>September 2019</b> | 2528      | 15 132      | 8006     | 18 187  | 119 364 | 1685     | 31 083  | 9338   | 7418        | 55 197                | 4340         | 25 649  |
| <b>October 2019</b>   | 2240      | 14 709      | 7830     | 17 181  | 132 694 | 1690     | 31 896  | 9351   | 7168        | 55 289                | 4184         | 29 081  |
| <b>November 2019</b>  | 2105      | 13 686      | 7233     | 15 476  | 113 301 | 1531     | 29 610  | 8431   | 6826        | 51 948                | 3813         | 24 474  |
| <b>December 2019</b>  | 1686      | 13 046      | 6934     | 15 424  | 116 846 | 1482     | 29 193  | 8076   | 6803        | 51 631                | 3819         | 22 040  |
| <b>January 2020</b>   | 2180      | 14 015      | 7327     | 16 610  | 116 913 | 1576     | 30 161  | 9677   | 7108        | 52 864                | 4108         | 27 928  |

(continued)

**Supplementary Table SIII Continued**

| Months                | Lithuania | Netherlands | Portugal | Romania | Russia | Slovenia | Spain | Sweden | Switzerland | UK: England and Wales | UK: Scotland | Ukraine |
|-----------------------|-----------|-------------|----------|---------|--------|----------|-------|--------|-------------|-----------------------|--------------|---------|
| <b>February 2020</b>  | 1913      | 12866       | 6359     | 14704   | 106641 | 1350     | 26771 | 8954   | 6738        | 48364                 | 3777         | 23157   |
| <b>March 2020</b>     | 2010      | 13498       | 7164     | 14556   | 109333 | 1527     | 28994 | 9646   | 7071        | 51293                 | 3992         | 19409   |
| <b>April 2020</b>     | 2115      | 13322       | 6954     | 14420   | 112570 | 1480     | 27078 | 9713   | 7060        | 49550                 | 3844         | 21843   |
| <b>May 2020</b>       | 2188      | 13731       | 7240     | 15379   | 108165 | 1606     | 28317 | 10408  | 7369        | 52285                 | 3884         | 23631   |
| <b>June 2020</b>      | 2146      | 13894       | 6822     | 15516   | 116616 | 1606     | 28243 | 9877   | 7324        | 51629                 | 4073         | 23166   |
| <b>July 2020</b>      | 2311      | 15572       | 7438     | 16702   | 128604 | 1707     | 29848 | 10119  | 7810        | 53604                 | 4266         | 29617   |
| <b>August 2020</b>    | 2244      | 15065       | 7218     | 15305   | 124579 | 1737     | 29449 | 9959   | 7375        | 51728                 | 4067         | 24387   |
| <b>September 2020</b> | 2330      | 14914       | 7662     | 16138   | 128255 | 1697     | 30107 | 9323   | 7440        | 53136                 | 4100         | 27519   |
| <b>October 2020</b>   | 2072      | 14450       | 7377     | 14653   | 122727 | 1648     | 30017 | 9174   | 7250        | 53770                 | 4138         | 26621   |
| <b>November 2020</b>  | 1875      | 13512       | 6843     | 12644   | 111016 | 1402     | 26470 | 8194   | 6494        | 49834                 | 3698         | 21621   |
| <b>December 2020</b>  | 1760      | 13227       | 6287     | 11982   | 127238 | 1431     | 22980 | 8033   | 6875        | 47500                 | 3693         | 24558   |
| <b>January 2021</b>   | 1678      | 13899       | 5931     | 13852   | 104929 | 1498     | 23898 | 9070   | 6861        | 47823                 | 3633         | 21931   |
| <b>February 2021</b>  | 1624      | 13448       | 5692     | 11816   | 100522 | 1297     | 24402 | 8988   | 6399        | 46278                 | 3439         | 21763   |
| <b>March 2021</b>     | 1964      | 14852       | 6597     | 13606   | 126196 | 1541     | 28964 | 10064  | 6817        | 52473                 | 3946         | 23820   |
| <b>April 2021</b>     | 1847      | 14472       | 6212     | 12664   | 108941 | 1452     | 27493 | 9820   | 6453        |                       | 3718         | 21511   |
| <b>May 2021</b>       | 2080      | 14750       | 6678     | 13524   | 105025 | 1465     | 27898 | 10317  | 6636        |                       | 3897         | 20601   |
| <b>June 2021</b>      | 2262      | 14768       |          | 14877   | 121783 | 1502     | 28024 | 10207  | 6786        |                       |              |         |
