# Supplementary material
Source: PubMed Central journal article supplement (PMC9619770)
Supplement: deac215_supplementary_table_siv.pdf [file deac215_supplementary_table_siv.pdf]

**Supplementary Table SIV** Seasonality of live births in Europe (Random-effects GLS regression, clustered by country).

| Months         | Crude random-effects GLS regression,<br>clustered by country |       |                      | Random-effects GLS regression adjusted on births<br>seasonality, clustered by country |       |                     |
|----------------|--------------------------------------------------------------|-------|----------------------|---------------------------------------------------------------------------------------|-------|---------------------|
|                | Coef.                                                        | P     | 95% CI               | Coef.                                                                                 | P     | 95% CI              |
| January 2018   | -2650.50                                                     | 0.000 | -4067.46 to -1233.54 | 165.67                                                                                | 0.265 | -125.65 to 457.01   |
| February 2018  | -904.08                                                      | 0.211 | -2321.04 to 512.88   | -681.01                                                                               | 0.268 | -2741.78 to 1379.76 |
| March 2018     | -1658.83                                                     | 0.022 | -3075.79 to -241.87  | -1034.61                                                                              | 0.060 | -3075.79 to 1006.57 |
| April 2018     | -311.17                                                      | 0.667 | -1728.13 to 1105.79  | -204.04                                                                               | 0.642 | -1698.02 to 1493.98 |
| May 2018       | -185.75                                                      | 0.797 | -1602.71 to 1231.21  | 82.90                                                                                 | 0.781 | -498.31 to 663.10   |
| June 2018      | 1435.21                                                      | 0.047 | 18.25 to 2852.17     | 267.63                                                                                | 0.171 | -115.92 to 651.18   |
| July 2018      | 1241.04                                                      | 0.086 | -175.92 to 2658.00   | 1423.01                                                                               | 0.067 | -80.03 to 2926.05   |
| August 2018    | 263.46                                                       | 0.716 | -1153.50 to 1680.42  | 331.52                                                                                | 0.574 | -802.51 to 1165.55  |
| September 2018 | 337.13                                                       | 0.641 | -1079.84 to 1754.09  | 498.11                                                                                | 0.547 | -702.57 to 1698.79  |
| October 2018   | -1488.38                                                     | 0.040 | -2905.34 to -71.42   | -1030.45                                                                              | 0.089 | -2267.02 to 206.12  |
| November 2018  | -1868.50                                                     | 0.010 | -3285.46 to -451.54  | -764.41                                                                               | 0.093 | -2093.37 to 564.55  |
| December 2018  | -898.33                                                      | 0.214 | -2315.29 to 518.63   | -702.34                                                                               | 0.276 | -2157.82 to 753.14  |
| January 2019   | -3375.00                                                     | 0.000 | -4791.96 to -1958.04 | -48.74                                                                                | 0.834 | -503.81 to 406.32   |
| February 2019  | -1967.92                                                     | 0.006 | -3384.88 to -550.96  | -1511.12                                                                              | 0.103 | -3287.12 to 264.88  |
| March 2019     | -2092.88                                                     | 0.004 | -3509.84 to -675.92  | -1041.98                                                                              | 0.112 | -2508.87 to 424.91  |
| April 2019     | -1087.42                                                     | 0.133 | -2504.38 to 329.54   | -1082.11                                                                              | 0.137 | -2502.17 to 337.95  |
| May 2019       | -1490.17                                                     | 0.039 | -2907.13 to -73.21   | -8.19                                                                                 | 0.977 | -554.00 to 537.61   |
| June 2019      | 983.67                                                       | 0.174 | -433.29 to 2400.63   | -360.98                                                                               | 0.336 | -1096.23 to 374.28  |
| July 2019      | 295.04                                                       | 0.683 | -1121.92 to 1712.00  | 121.00                                                                                | 0.892 | -1006.98 to 1127.98 |
| August 2019    | -486.75                                                      | 0.501 | -1903.71 to 930.21   | -506.89                                                                               | 0.597 | -1983.73 to 969.95  |
| September 2019 | 26.13                                                        | 0.971 | -1390.84 to 1443.09  | 14.78                                                                                 | 0.982 | -1375.62 to 1405.18 |
| October 2019   | -2154.96                                                     | 0.003 | -3571.92 to -738.00  | -1479.25                                                                              | 0.087 | -3271.92 to 313.42  |
| November 2019  | -2220.83                                                     | 0.002 | -3637.79 to -803.87  | -751.55                                                                               | 0.058 | -1534.17 to 34.07   |
| December 2019  | -1348.75                                                     | 0.062 | -2765.71 to 68.21    | -41.06                                                                                | 0.873 | -1465.25 to 1424.19 |
| January 2020   | -3334.58                                                     | 0.000 | -4751.54 to -1917.62 | -1043.76                                                                              | 0.243 | -2654.23 to 566.71  |
| February 2020  | -2663.13                                                     | 0.000 | -4080.09 to -1246.17 | 194.11                                                                                | 0.365 | -225.52 to 613.74   |
| March 2020     | -2835.63                                                     | 0.000 | -4252.59 to -1418.67 | -793.29                                                                               | 0.478 | -2784.12 to 1197.54 |
| April 2020     | -2192.75                                                     | 0.002 | -3609.71 to -775.79  | -164.61                                                                               | 0.753 | -847.53 to 518.31   |
| May 2020       | -1786.67                                                     | 0.013 | -3203.63 to -369.71  | -441.46                                                                               | 0.267 | -1220.70 to 337.78  |
| June 2020      | -9.67                                                        | 0.989 | -1426.63 to 1407.29  | 38.27                                                                                 | 0.989 | -131.17 to 207.72   |
| July 2020      | -843.63                                                      | 0.243 | -2260.59 to 573.33   | -831.67                                                                               | 0.271 | -2252.85 to 589.51  |
| August 2020    | -445.42                                                      | 0.538 | -1862.38 to 971.54   | -1003.88                                                                              | 0.165 | -2420.84 to 413.08  |
| September 2020 | -1003.88                                                     | 0.165 | -2420.84 to 413.08   | -207.32                                                                               | 0.548 | -1687.37 to 1272.73 |
| October 2020   | -3116.25                                                     | 0.000 | -4533.21 to -1699.29 | -1095.19                                                                              | 0.158 | -2587.45 to 397.07  |
| November 2020  | -2668.71                                                     | 0.000 | -4085.67 to -1251.75 | -1053.12                                                                              | 0.063 | -2172.32 to 66.08   |
| December 2020  | -3620.54                                                     | 0.000 | -5037.50 to -2203.58 | -525.97                                                                               | 0.506 | -2075.00 to 1023.06 |
| January 2021   | -4133.13                                                     | 0.000 | -5550.09 to -2716.17 | -1466.93                                                                              | 0.001 | -2329.14 to -604.71 |
| February 2021  | -1361.83                                                     | 0.060 | -2778.79 to 55.13    | -504.17                                                                               | 0.689 | -2118.24 to 1109.90 |
| March 2021     | -2890.33                                                     | 0.000 | -4339.95 to -1440.72 | 1030.85                                                                               | 0.152 | -378.80 to 2440.50  |
