# Supplementary material
Source: PubMed Central journal article supplement (PMC9619770)
Supplement: deac215_supplementary_table_sv.pdf [file deac215_supplementary_table_sv.pdf]

**Supplementary Table SV Variation in monthly live births compared to the monthly average in 2018–2020.**

| Months         | Austria   | Belgium     | Croatia  | Czechia | Denmark | Estonia  | Finland | France  | Germany     | Hungary               | Italy        | Latvia  |                |
|----------------|-----------|-------------|----------|---------|---------|----------|---------|---------|-------------|-----------------------|--------------|---------|----------------|
| January 2020   | -2.91%    | -1.91%      | 8.18%    | -1.13%  | -1.16%  | 3.04%    | -1.77%  | -1.35%  | -0.97%      | 6.89%                 | -4.18%       | -1.79%  |                |
| February 2020  | -1.85%    | -0.20%      | 3.99%    | 1.69%   | 4.31%   | -1.28%   | 4.62%   | 2.71%   | 1.49%       | 5.46%                 | 0.83%        | -6.83%  |                |
| March 2020     | -1.61%    | 2.65%       | -13.90%  | -5.16%  | 0.06%   | -14.18%  | 0.59%   | 2.14%   | -0.68%      | 0.71%                 | -6.06%       | -7.66%  |                |
| April 2020     | -2.54%    | -0.12%      | 5.72%    | -3.64%  | -2.69%  | -11.82%  | -2.88%  | -1.46%  | -1.84%      | 3.82%                 | -5.23%       | -2.67%  |                |
| May 2020       | -1.80%    | -5.03%      | -1.48%   | -2.49%  | -3.48%  | -4.37%   | -1.22%  | -2.74%  | -2.21%      | 2.72%                 | -8.16%       | -2.88%  |                |
| June 2020      | -0.96%    | -1.76%      | 0.26%    | -5.35%  | 1.54%   | -13.73%  | -1.93%  | -2.55%  | -2.07%      | 5.84%                 | -4.98%       | -9.90%  |                |
| July 2020      | -2.04%    | -2.49%      | -6.73%   | -2.38%  | -0.55%  | -4.07%   | 0.22%   | -3.56%  | -2.82%      | 3.96%                 | -6.07%       | -14.10% |                |
| August 2020    | 0.06%     | -6.05%      | -0.16%   | -3.28%  | 1.68%   | -11.03%  | -1.03%  | -5.09%  | -2.55%      | 1.99%                 | -6.07%       | -9.59%  |                |
| September 2020 | -1.66%    | -2.03%      | -1.42%   | -1.25%  | -2.93%  | -1.61%   | -1.08%  | -3.20%  | -0.93%      | 6.95%                 | -2.32%       | -7.89%  |                |
| October 2020   | -0.96%    | -5.62%      | 1.12%    | -1.59%  | -0.85%  | -8.04%   | 1.15%   | -3.82%  | -1.42%      | 1.86%                 | -5.55%       | -10.24% |                |
| November 2020  | -3.51%    | -6.91%      | -5.33%   | -4.33%  | -2.03%  | -9.45%   | -2.06%  | -5.43%  | -1.40%      | 1.55%                 | -10.15%      | -8.37%  |                |
| December 2020  | -3.65%    | -7.97%      | -8.42%   | -1.72%  | -1.21%  | -8.11%   | 2.79%   | -7.63%  | 1.46%       | -3.76%                | -13.31%      | -11.55% |                |
| January 2021   | -3.45%    | -12.22%     | -2.87%   | -3.18%  | 1.94%   | -12.80%  | 0.49%   | -14.39% | -7.06%      | -3.17%                | -17.12%      | -15.47% |                |
| February 2021  | 2.59%     | -0.24%      | 2.65%    | 2.95%   | 4.09%   | -5.74%   | 11.79%  | -5.90%  | 6.92%       | 6.97%                 | -6.83%       | -13.55% |                |
| March 2021     | 1.82%     | 6.05%       | 8.14%    | 1.17%   | 7.22%   | 2.29%    | 11.33%  | 2.49%   | 5.18%       | 10.93%                | -1.55%       | -7.16%  |                |
| April 2021     | -1.81%    | 2.06%       | 6.49%    |         | 0.68%   | -11.73%  | 3.86%   | 2.51%   | 0.24%       | 3.04%                 | -5.01%       | -15.72% |                |
| May 2021       | -1.57%    | -5.19%      | 3.87%    |         | 1.70%   | -7.19%   | 3.90%   | -4.88%  | -1.99%      | 0.49%                 | -12.33%      | -8.40%  |                |
| June 2021      | -0.29%    | -0.27%      | -0.36%   |         | -0.77%  | -19.44%  | 9.43%   | -4.38%  |             | 5.45%                 |              | -10.49% |                |
| Months         | Lithuania | Netherlands | Portugal | Romania | Russia  | Slovenia | Spain   | Sweden  | Switzerland | UK: England and Wales | UK: Scotland | Ukraine | TOTAL          |
| January 2020   | -6.54%    | -0.96%      | 1.52%    | -8.06%  | -9.82%  | -4.02%   | -3.44%  | 1.87%   | -1.96%      | -3.79%                | -2.75%       | -3.71%  | <b>-3.99%</b>  |
| February 2020  | -7.11%    | 5.38%       | 1.05%    | -4.03%  | -7.36%  | -3.19%   | -3.37%  | 2.08%   | 4.38%       | -0.30%                | -0.26%       | -7.25%  | <b>-1.50%</b>  |
| March 2020     | -13.01%   | 0.12%       | 4.30%    | -10.27% | -12.19% | -4.41%   | -2.61%  | -3.00%  | -0.41%      | -3.92%                | -3.28%       | -26.47% | <b>-5.39%</b>  |
| April 2020     | -7.68%    | -1.81%      | 3.01%    | -7.50%  | -8.21%  | -3.58%   | -6.76%  | -4.26%  | -0.13%      | -4.53%                | -6.43%       | -9.69%  | <b>-4.63%</b>  |
| May 2020       | -10.42%   | -5.20%      | -1.62%   | -7.89%  | -12.97% | -4.29%   | -6.60%  | 0.19%   | -1.31%      | -6.40%                | -10.19%      | -14.73% | <b>-6.74%</b>  |
| June 2020      | -11.47%   | -2.24%      | -1.31%   | -7.44%  | -7.65%  | -3.11%   | -4.03%  | -2.05%  | -1.38%      | -4.88%                | -3.63%       | -6.02%  | <b>-4.38%</b>  |
| July 2020      | -12.53%   | 1.21%       | -0.50%   | -10.74% | -8.89%  | -5.14%   | -6.24%  | -3.21%  | -2.21%      | -5.38%                | -5.94%       | -3.25%  | <b>-5.12%</b>  |
| August 2020    | -9.11%    | -1.45%      | -6.79%   | -11.35% | -10.23% | -0.88%   | -7.96%  | -3.59%  | -5.08%      | -7.72%                | -7.25%       | -17.41% | <b>-6.87%</b>  |
| September 2020 | -6.63%    | -0.86%      | -3.35%   | -7.82%  | 1.07%   | 0.56%    | -3.36%  | -1.67%  | -1.21%      | -4.55%                | -5.33%       | 1.55%   | <b>-1.45%</b>  |
| October 2020   | -9.44%    | -0.80%      | -6.01%   | -9.99%  | -8.41%  | -1.93%   | -7.31%  | -2.15%  | -0.23%      | -3.94%                | -3.35%       | -11.34% | <b>-5.20%</b>  |
| November 2020  | -11.16%   | -0.89%      | -6.08%   | -11.00% | -6.34%  | -9.29%   | -12.00% | -3.49%  | -5.80%      | -5.96%                | -8.02%       | -15.23% | <b>-6.24%</b>  |
| December 2020  | -7.66%    | 1.13%       | -11.64%  | -14.48% | 7.39%   | -3.73%   | -22.99% | -2.21%  | 1.15%       | -9.76%                | -8.52%       | 8.40%   | <b>-2.26%</b>  |
| January 2021   | -28.06%   | -1.78%      | -17.82%  | -23.33% | -19.06% | -8.77%   | -23.49% | -4.52%  | -5.37%      | -12.96%               | -13.99%      | -24.38% | <b>-14.12%</b> |
| February 2021  | -21.15%   | 10.15%      | -9.55%   | -22.88% | -12.68% | -6.99%   | -11.92% | 2.47%   | -0.87%      | -4.60%                | -9.19%       | -12.83% | <b>-5.17%</b>  |
| March 2021     | -15.00%   | 10.16%      | -3.95%   | -16.13% | 1.36%   | -3.54%   | -2.71%  | 1.21%   | -3.99%      | -1.71%                | -4.40%       | -9.76%  | <b>0.64%</b>   |
| April 2021     | -19.38%   | 6.67%       | -7.98%   | -18.77% | -11.17% | -5.41%   | -5.33%  | -3.21%  | -8.71%      |                       | -9.49%       | -11.07% | <b>-4.77%</b>  |
| May 2021       | -14.84%   | 1.84%       | -9.26%   | -19.00% | -15.50% | -12.69%  | -7.99%  | -0.68%  | -11.12%     |                       | -9.89%       | -25.67% | <b>-9.07%</b>  |
| June 2021      | -6.68%    | 3.91%       |          | -11.26% | -3.56%  | -9.38%   | -4.77%  | 1.22%   | -8.62%      |                       |              |         | <b>-3.25%</b>  |
